# Supplementary material
Source: PubMed Central journal article supplement (PMC4036560)
Supplement: supp_tpc.113.121590_tpc121590Supplemental.pdf [file supp_tpc.113.121590_tpc121590Supplemental.pdf]

### Supplemental Figure 1: Mean coverage statistics for targeted and non-targeted regions of the rice genome, for each sample.

For each sample, mean coverage per bp was calculated for all positions included in the capture targets (A) and for all other positions (B). The relationship between coverage and number of sequencing reads obtained for each library is shown. Samples processed in the same capture reaction are labelled in the same color, with the exception of the samples present in capture 5, which are divided into "EMS samples" and "genotypes". \* Capture #1 failed at the sequencing level and is therefore not included in this figure.

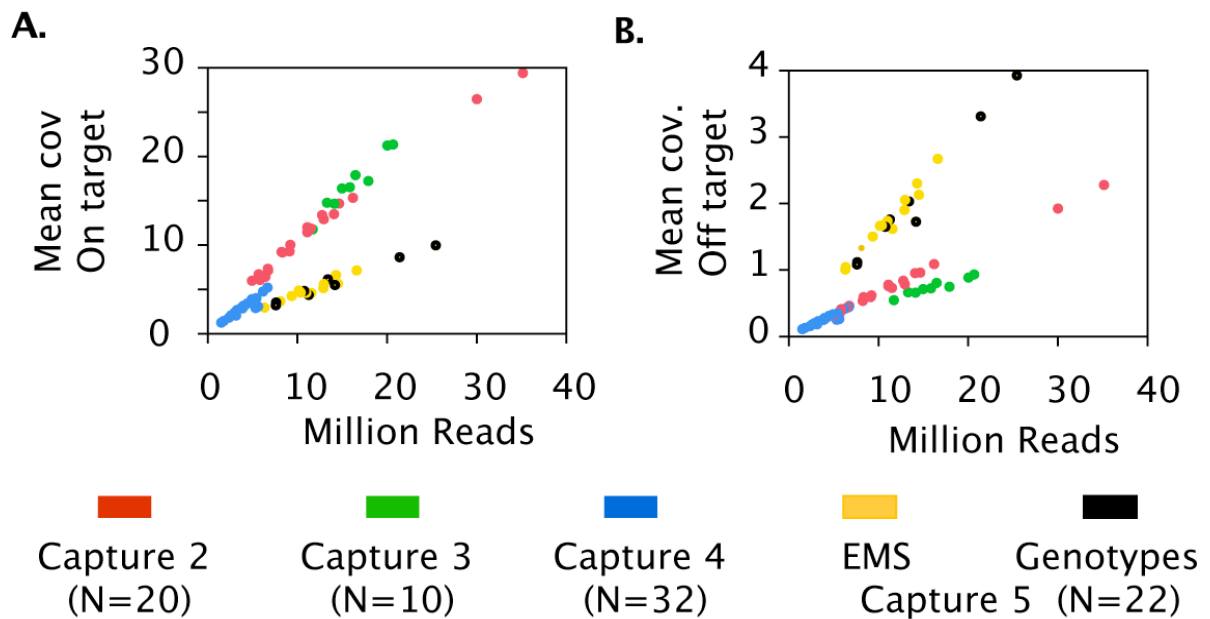

## Supplemental Figure 2 - Consistency of capture between rice samples.

For each sample, the number of reads mapping to each target tile was calculated. Next, these coverage numbers were compared between samples on a pair-wise basis. **A.** Example of the correlation between tile coverage in two sample processed in the same capture. Each dot represents a target tile. The regression p-value and  $R^2$  values are indicated. **B.** Comparisons were divided into four categories, based on whether the two samples were of the same genotype or not and whether they were part of the same capture reaction or not. For each category, mean  $R^2$  and standard deviation values were calculated.

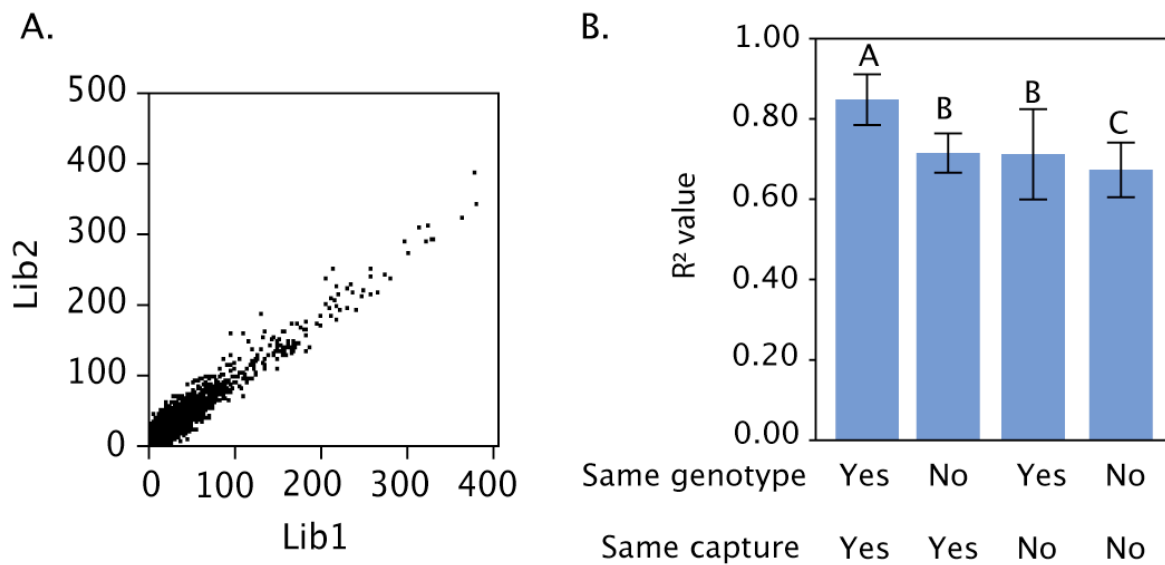

### Supplemental Figure 3 - Effect of GC content on rice target coverage.

**A.** Target coverage was expressed as the percentage of reads mapping to each target tile, and normalized based on target length. For each tile, the mean target coverage was calculated and the distribution of values is represented. Inset: distribution of GC content per target tile. Selection of tiles with a GC content above 60% corresponds to a highly biased subset of target tiles associated with low target coverage (dark gray subset on both graphs). **B.** Direct effect of target tile GC content on the number of reads captured. Target tiles were divided into categories based on GC content (5% categories). For each GC category, the mean is indicated by a straight line and the standard deviations are indicated by diamond shapes centered on the mean values. The distribution of target coverage were discarded before calculating the mean percentage of coverage per genome content category.

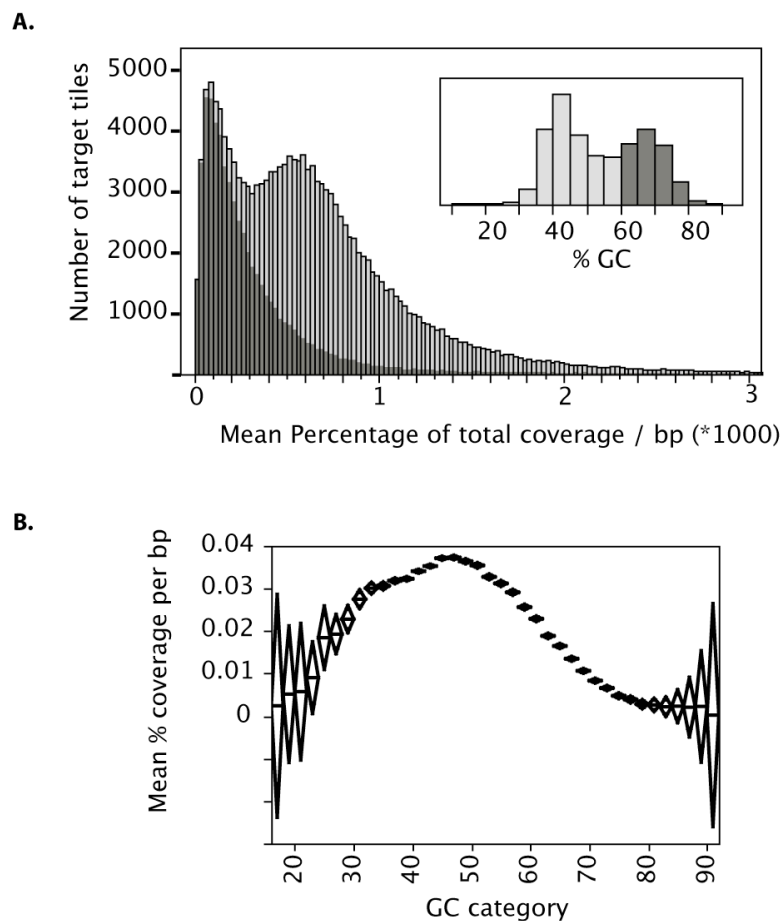

### Supplemental Figure 4 - Effect of sample pooling prior to sequence capture on the presence of clonal reads.

Up to 28 rice genomic libraries were pooled together prior to performing the capture reactions. It is possible that a high level of pooling could be detrimental to downstream analyses. Indeed, it is possible that, if too few fragments are contributed from each library, the resulting captured reads will have low complexity. This can be assessed by measuring the percentage of unique reads in each sample. To be able to compare samples to each other, each read file must contain the same number of reads. Therefore, 2.5 million reads were randomly selected from each of the samples for which at least 2.5 million reads had been obtained. Next, the percentage of unique reads (reads that have a unique starting position and direction after mapping to the reference genome) was calculated (see "Read processing" in the Methods section). Observing a lower percentage of unique reads from samples that experienced a higher level of pooling would be diagnostic of a detrimental effect of pooling. For each capture, the mean percentage of unique reads was calculated. The means and standard deviations are shown. Outliers are indicated by dots. There were no significant differences between the means observed for the different captures. Capture #1 failed at the sequencing level and is therefore not included in this figure.

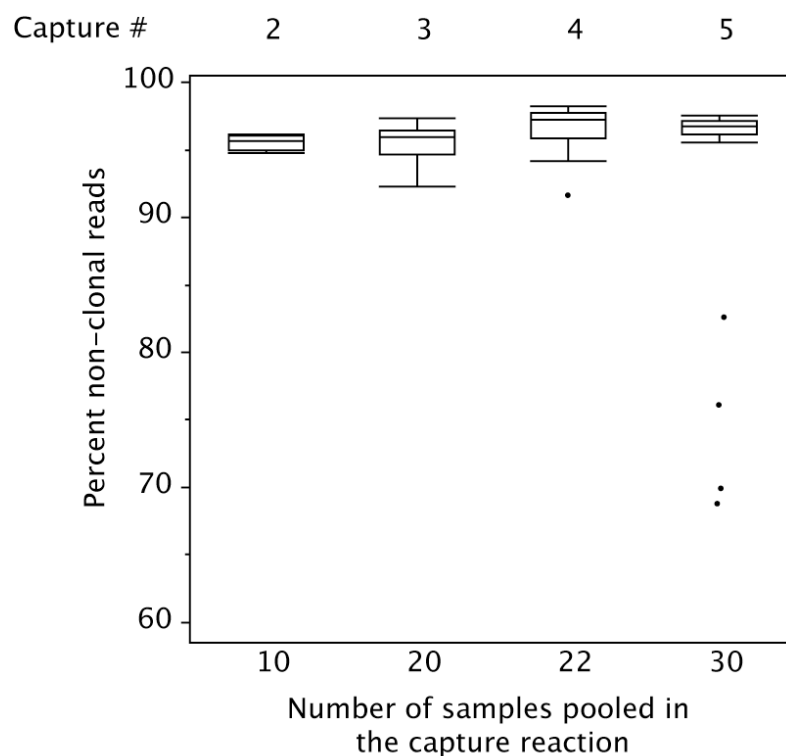

### Supplemental Figure 5 - Distribution of mutations along the 12 rice chromosomes in an EMS-mutagenized sample and a potential seed contaminant.

One of the rice EMS-mutagenized samples exhibited a lower percentage of expected (CG>TA) mutations than all other samples. To test whether this sample is a seed contaminant, the location of the mutations found in this sample were plotted along the twelve chromosomes of the rice genome (B). A control individual is shown on top for comparison (A). In the control sample, mutations are evenly distributed along the chromosomes while the potential seed contaminant exhibits islands of high mutation density and regions of poor mutation density, reminiscent of potential introgressed regions from a different genotype.

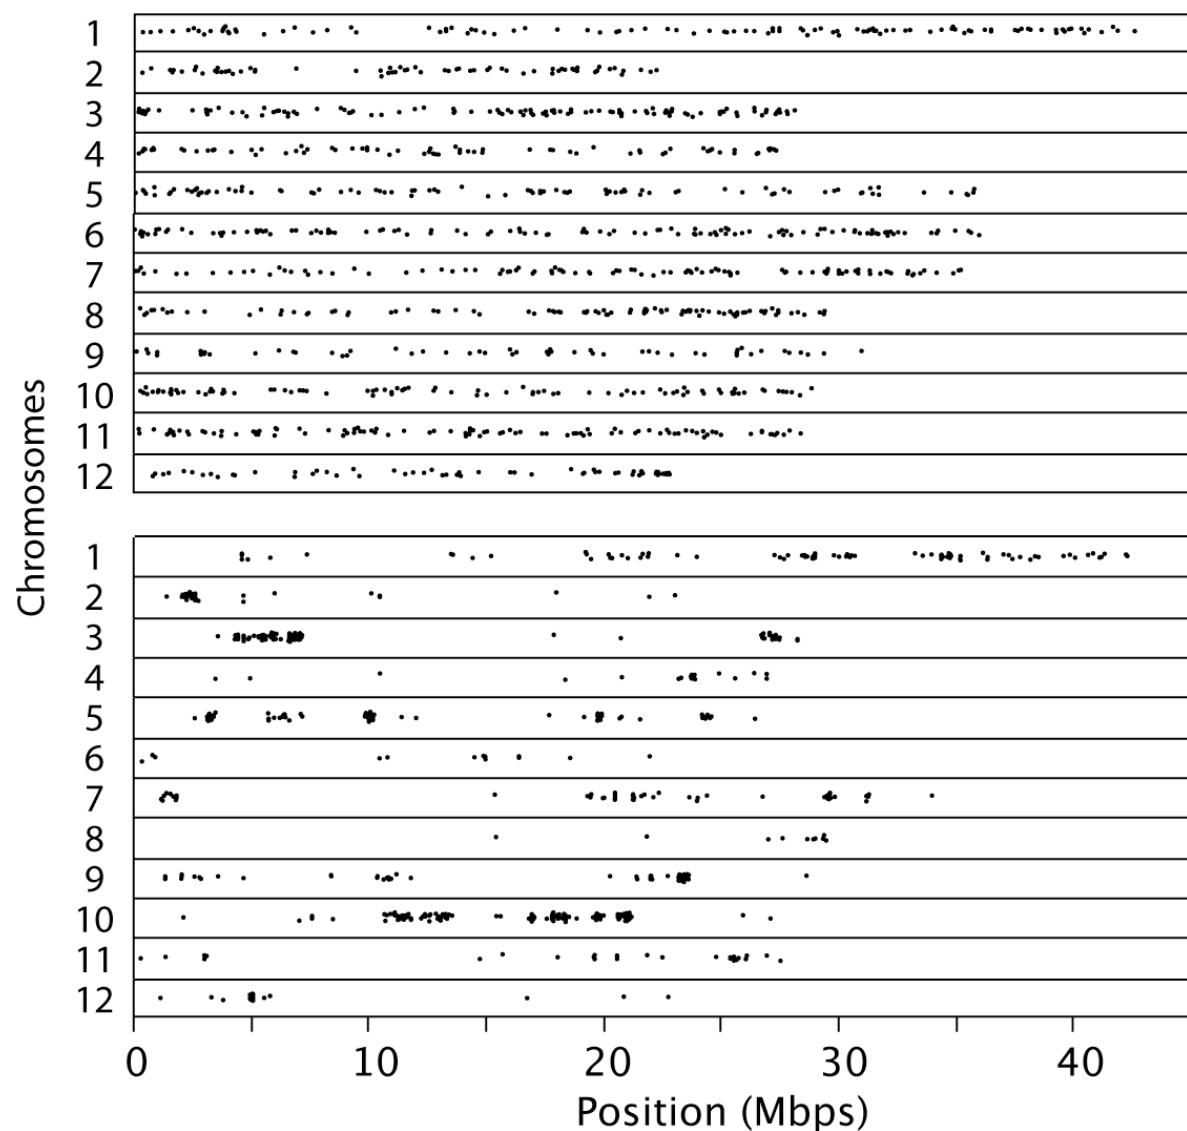

## Supplemental Figure 6 – Relationship between cytosine methylation and EMS targeting depending on sequence context in rice.

Observed (thick green vertical lines) and expected (distribution of values) percentages of fully methylated (Fully), partially methylated (Partially) and unmethylated (Not) cytosines opposite and / or flanking the mutated guanines. For each graph, the thick green line represents the observed percentages from the mutated positions. The number of positions included in the calculation of those percentages depends on the number of mutations (N) for which methylation data were available. The distribution of expected percentages upon random selection of N nucleotides or dinucleotides for which methylation data are available is shown in black (100,000 random samplings). The top panel shows data for all mutated guanines at once. The bottom two panels depict how these percentages vary depending on the nucleotide context. G\*: guanine residues that were found to be mutagenized in our captured individuals. The cytosine residue for which the methylation state is evaluated is surrounded by a black square.

\*\*\*: less than 10/100,000 random samples exhibited values further from the mean of the distribution than the observed mean (green line).

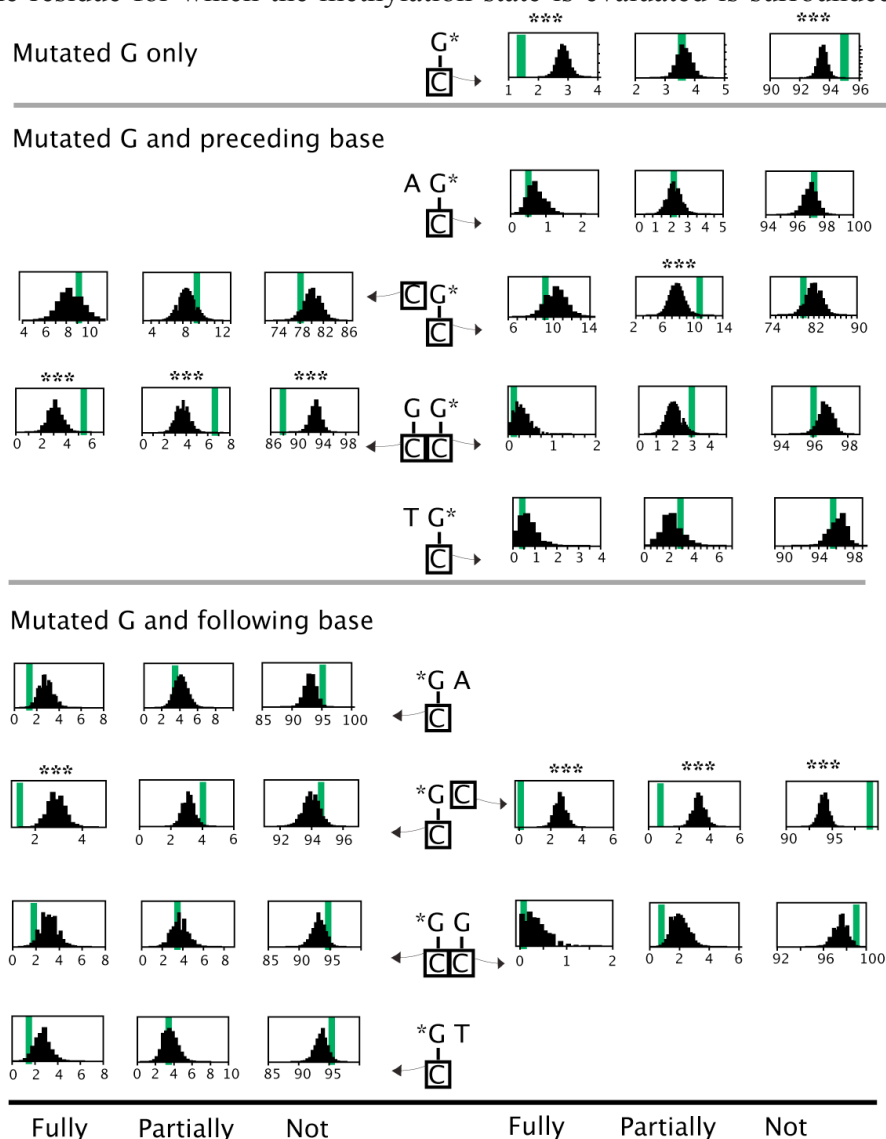

**Supplemental Table 1 - Parameters used for mutation detection using the MAPS bioinformatics pipeline for each of the capture reactions.**

All other parameters were set to the default values.

| Capture number*                        | 2      | 3     | 4      | 5      | Wheat |
|----------------------------------------|--------|-------|--------|--------|-------|
| Number of libraries                    | 20     | 10    | 28     | 22     | 8     |
| Minimum # libraries covered (-l)       | 5      | 4     | 7      | 5      | 5     |
| Minimum total coverage (-v)            | 20     | 20    | 20     | 20     | 10    |
| <b>MAPS 1-specific parameters</b>      |        |       |        |        |       |
| Maximum coverage (-c)                  | 10,000 | 5,000 | 15,000 | 11,000 | 5,000 |
| Min. % of each het. allele (-i)        | 5      | 5     | 5      | 5      | 5     |
| <b>MAPS 2-specific parameters</b>      |        |       |        |        |       |
| Min.% of mutant het. allele (-d)       | 20     | 20    | 20     | 20     | 15    |
| Min. cov. of mutant het. allele (-p)   | 4      | 4     | 4      | 4      | 5-7   |
| Min. cov. of mutant homoz. allele (-s) | 3      | 3     | 3      | 3      | 4-5   |

\* Capture #1 failed at the sequencing level and is therefore not included in this report. Het. = Heterozygous. Homoz. = Homozygous

## Supplemental Table 2 – List of mutations selected for PCR validation.

| Chr.  | Pos.     | Conf. | Tot. Cov. | Lib.   | Capture | Ho/He | WT Cov. | MA Cov. | Type | Lib. Cov. | # libs | Gene Model       |
|-------|----------|-------|-----------|--------|---------|-------|---------|---------|------|-----------|--------|------------------|
| chr1  | 1933530  | No    | 137       | uN5    | 2       | hom   | 0       | 5       | GA   | 5         | 19     | LOC_Os01g04340.1 |
| chr1  | 21118556 | No    | 60        | uN8    | 2       | hom   | 0       | 3       | GA   | 3         | 15     | LOC_Os01g37760.1 |
| chr4  | 17856816 | No    | 497       | uN18   | 2       | het   | 21      | 12      | CT   | 33        | 20     | LOC_Os04g30210.1 |
| chr1  | 8084712  | Yes   | 299       | uN2    | 2       | hom   | 0       | 6       | CT   | 6         | 19     | LOC_Os01g14440.1 |
| chr1  | 28937946 | Yes   | 383       | uN7    | 2       | hom   | 0       | 21      | GA   | 21        | 20     | LOC_Os01g50410.1 |
| chr1  | 32082308 | Yes   | 36        | uE1725 | 3       | hom   | 0       | 5       | CT   | 5         | 10     | LOC_Os01g55710.1 |
| chr1  | 34481567 | Yes   | 190       | uE2067 | 3       | hom   | 0       | 16      | CT   | 16        | 10     | LOC_Os01g59620.1 |
| chr10 | 1905155  | Yes   | 184       | uN17   | 2       | hom   | 0       | 6       | TA   | 6         | 19     | LOC_Os10g04120.1 |
| chr10 | 17966415 | Yes   | 251       | uE2093 | 3       | hom   | 0       | 12      | GA   | 12        | 10     | LOC_Os10g33930.1 |
| chr11 | 5088590  | Yes   | 105       | uE2052 | 3       | hom   | 0       | 9       | GA   | 9         | 10     | LOC_Os11g09478.1 |
| chr6  | 15968921 | Yes   | 370       | uN17   | 2       | hom   | 0       | 9       | GA   | 9         | 20     | LOC_Os06g28124.1 |
| chr2  | 33927444 | Yes   | 43        | uE2093 | 3       | hom   | 0       | 4       | GA   | 4         | 10     | LOC_Os02g55400.1 |
| chr11 | 16970380 | Yes   | 172       | uE1719 | 3       | het   | 8       | 11      | CA   | 19        | 9      | LOC_Os11g29990.1 |
| chr11 | 21851803 | Yes   | 194       | uE1725 | 3       | het   | 14      | 11      | GA   | 25        | 10     | LOC_Os11g37740.1 |
| chr12 | 9475488  | Yes   | 215       | uN20   | 2       | het   | 21      | 17      | CA   | 38        | 20     | LOC_Os12g16540.1 |
| chr12 | 10018408 | Yes   | 258       | uN20   | 2       | het   | 13      | 13      | GA   | 26        | 20     | LOC_Os12g17490.1 |
| chr5  | 26081241 | Yes   | 98        | uE1725 | 3       | het   | 4       | 9       | GA   | 13        | 10     | LOC_Os05g44970.1 |
| chr6  | 21106121 | Yes   | 283       | uE1733 | 3       | het   | 18      | 19      | GA   | 37        | 9      | LOC_Os06g36080.1 |
| chr8  | 17344642 | Yes   | 322       | uE1733 | 3       | het   | 13      | 18      | GA   | 31        | 10     | LOC_Os08g28410.1 |
| chr8  | 25102686 | Yes   | 275       | uE1733 | 3       | het   | 15      | 7       | GA   | 22        | 10     | LOC_Os08g39640.1 |
| chr9  | 6116830  | Yes   | 168       | uE2052 | 3       | het   | 7       | 10      | AT   | 17        | 10     | LOC_Os09g11020.1 |
| chr9  | 17093064 | Yes   | 221       | uE1733 | 3       | het   | 12      | 8       | GA   | 20        | 10     | LOC_Os09g28180.1 |

**Chr.:** Chromosome, **Pos.:** Position, **Conf.:** Sanger sequencing confirmed the mutation (yes/no), **Tot. Cov.:** Total coverage at that position for all samples in that capture experiment, **Lib.:** Name of the sample exhibiting the mutation, **Capture:** Capture experiment. Capture #1 failed at the sequencing level and is therefore not included in this report. **Ho/He:** The mutation was predicted to be homozygous or heterozygous, **WT Cov.:** Coverage of the WT allele for the sample carrying the mutation, **MA Cov.:** Coverage of the mutant allele for the sample carrying the mutation, **Type:** Type of mutation observed (WTallele-Mutant allele), **Lib. Cov.:** Total coverage for the sample carrying the mutation, **# libs:** Number of libraries exhibiting a coverage of at least one at that position, in that capture reaction, **Gene Model:** Name of the gene model for which the mutation is predicted to result in a mis-sense mutation
